# Supplementary material for: Complete oxidation of hydroxymethylfurfural to furandicarboxylic acid by aryl-alcohol oxidase
Source: PubMed Central journal article supplement (PMC6737615; doi:10.1186/s13068-019-1555-z), 2019-09-10
Supplement: 13068_2019_1555_MOESM1_ESM.pdf [file 13068_2019_1555_MOESM1_ESM.pdf]

## SUPPORTING INFORMATION

# Complete oxidation of hydroxymethylfurfural to furandicarboxylic acid by aryl-alcohol oxidase

Ana Serrano<sup>1</sup>, Eva Calviño<sup>2</sup>, Juan Carro<sup>1</sup>, Marisa I. Sánchez-Ruiz<sup>1</sup>, F. Javier Cañada<sup>2</sup> and Angel T. Martínez<sup>1</sup>

<sup>1</sup> *Biotechnology for Lignocellulosic Biomass, Centro de Investigaciones Biológicas, CSIC, Ramiro de Maeztu 9, E-28040 Madrid, Spain*

<sup>2</sup> *NMR and Molecular Recognition, Centro de Investigaciones Biológicas, CSIC, Ramiro de Maeztu 9, E-28040 Madrid, Spain*

Supporting information includes H<sub>2</sub>O<sub>2</sub> effect on oxidation of furfurals (**Table S1**), Kinetic parameters of AAO variants (**Table S2**), Sequences of PCR primers (**Table S3**), Spectroscopic properties of AAO variants (**Table S4**), Effect of low H<sub>2</sub>O<sub>2</sub> concentrations on FFCA oxidation (**Fig. S1**), Evolution of HMF, DFF and FFCA controls along time (**Fig. S2**), <sup>1</sup>H-NMR spectra of furfural standards (**Fig. S3**), NMR time-course of HMF reactions (**Fig. S4**), Surface access to AAO active site (**Fig. S5**), Active site of native AAO and ten variants (**Fig. S6**), and HPLC analyses of furfural standards (**Fig. S7**).

**Table S1.** H<sub>2</sub>O<sub>2</sub> effect in the reaction rates and AAO residual activities oxidizing furfurals

| $\text{HMF} \xrightarrow{k_1} \text{DFF} \xrightarrow{k_2} \text{FFCA} \xrightarrow{k_3} \text{FDCA}$ |                                       |                          |                          |                          |                           |
|-------------------------------------------------------------------------------------------------------|---------------------------------------|--------------------------|--------------------------|--------------------------|---------------------------|
| Furfural                                                                                              | [H <sub>2</sub> O <sub>2</sub> ] (mM) | $k_1$ (h <sup>-1</sup> ) | $k_2$ (h <sup>-1</sup> ) | $k_3$ (h <sup>-1</sup> ) | Activity (%) <sup>a</sup> |
| HMF <sup>b</sup>                                                                                      | 0                                     | 2.54 ± 0.03              | 1.38 ± 0.17              | n.d. <sup>e</sup>        | 93                        |
|                                                                                                       | 1.5                                   | 2.61 ± 0.05              | 1.13 ± 0.06              | n.d.                     | 98                        |
|                                                                                                       | 3.0                                   | 2.57 ± 0.02              | 1.07 ± 0.05              | n.d.                     | 96                        |
|                                                                                                       | 6.0                                   | 2.65 ± 0.02              | 1.22 ± 0.06              | n.d.                     | 90                        |
| DFF <sup>c</sup>                                                                                      | 0                                     | --                       | 1.23 ± 0.05              | n.d.                     | 99                        |
|                                                                                                       | 1.5                                   | --                       | 1.30 ± 0.03              | n.d.                     | 95                        |
|                                                                                                       | 3.0                                   | --                       | 1.30 ± 0.03              | n.d.                     | 83                        |
|                                                                                                       | 6.0                                   | --                       | 1.34 ± 0.07              | n.d.                     | 99                        |
| FFCA <sup>d</sup>                                                                                     | 0                                     | --                       | --                       | 0.016 ± 0.002            | 15                        |
|                                                                                                       | 1.5                                   | --                       | --                       | n.d.                     | 32                        |
|                                                                                                       | 3.0                                   | --                       | --                       | n.d.                     | 33                        |
|                                                                                                       | 6.0                                   | --                       | --                       | n.d.                     | 30                        |

<sup>a</sup> Residual activity measured after 6 h and 7 d of HMF/DFF and FFCA reactions, respectively

<sup>a</sup>  $k_1$  and  $k_2$  were calculated from equation  $[\text{DFF}] = [\text{HMF}]_0 \left( \frac{k_1}{k_2 - k_1} \right) (e^{-k_1 t} - e^{-k_2 t})$

<sup>b</sup>  $k_2$  was calculated from equation  $[\text{DFF}] = [\text{DFF}]_0 e^{-k_2 t}$

<sup>c</sup>  $k_3$  was calculated from equation  $[\text{FFCA}] = [\text{FFCA}]_0 e^{-k_3 t}$

<sup>e</sup> n.d.: Reaction not detected

**Table S2.** Kinetic parameters for the oxidation of HMF and DFF by native AAO and different mutated variants<sup>a</sup>

|                  | HMF                                       |                        |                                                                      | DFF                                       |                        |                                                                      | $k_{\text{cat}}^{\text{DFF}}/k_{\text{cat}}^{\text{HMF}}$<br>(relative to AAO) |
|------------------|-------------------------------------------|------------------------|----------------------------------------------------------------------|-------------------------------------------|------------------------|----------------------------------------------------------------------|--------------------------------------------------------------------------------|
|                  | $k_{\text{cat}}$<br>( $\text{min}^{-1}$ ) | $K_{\text{m}}$<br>(mM) | $k_{\text{cat}}/K_{\text{m}}$<br>( $\text{min}^{-1}\text{mM}^{-1}$ ) | $k_{\text{cat}}$<br>( $\text{min}^{-1}$ ) | $K_{\text{m}}$<br>(mM) | $k_{\text{cat}}/K_{\text{m}}$<br>( $\text{min}^{-1}\text{mM}^{-1}$ ) |                                                                                |
| AAO <sup>b</sup> | 20.1 ± 0.6                                | 1.6 ± 0.2              | 12.9 ± 1.2                                                           | 31.4 ± 0.7                                | 3.3 ± 0.2              | 9.4 ± 0.5                                                            | 1.56 (1)                                                                       |
| H91N             | 419.0 ± 14.0                              | 7.3 ± 0.7              | 57.2 ± 5.9                                                           | 256.0 ± 15.0                              | 14.5 ± 1.5             | 17.6 ± 2.1                                                           | 0.61 (0.39)                                                                    |
| H91S             | 8.9 ± 0.2                                 | 5.1 ± 0.3              | 1.7 ± 0.1                                                            | 26.3 ± 1.7                                | 11.6 ± 2.3             | 2.3 ± 0.5                                                            | 2.96 (1.89)                                                                    |
| Y92F             | 278.0 ± 16.0                              | 47.8 ± 8.5             | 5.8 ± 0.7                                                            | 325.0 ± 9.0                               | 39.3 ± 2.9             | 8.2 ± 0.4                                                            | 1.17 (0.75)                                                                    |
| Y92L             | 59.8 ± 2.7                                | 6.6 ± 0.9              | 9.1 ± 1.4                                                            | 109.0 ± 4.0                               | 16.3 ± 1.7             | 6.7 ± 0.7                                                            | 1.82 (1.17)                                                                    |
| F397Y            | 109.0 ± 3.0                               | 1.4 ± 0.2              | 76.8 ± 10.2                                                          | 287.0 ± 8.0                               | 7.0 ± 0.6              | 41.0 ± 3.7                                                           | 2.63 (1.69)                                                                    |
| I500A            | 4.4 ± 0.2                                 | 2.6 ± 0.5              | 1.7 ± 0.3                                                            | 21.2 ± 1.3                                | 3.3 ± 0.7              | 6.4 ± 1.4                                                            | 4.82 (3.08)                                                                    |
| I500M            | 4.3 ± 0.1                                 | 1.7 ± 0.2              | 2.6 ± 0.3                                                            | 23.1 ± 1.2                                | 5.4 ± 0.8              | 4.3 ± 0.7                                                            | 5.37 (3.44)                                                                    |
| F501H            | 44.3 ± 0.8                                | 16.2 ± 0.9             | 2.7 ± 0.2                                                            | 737.0 ± 55.0                              | 3.5 ± 0.7              | 214.0 ± 44.0                                                         | 16.64 (10.65)                                                                  |
| F501W            | 211.0 ± 6.0                               | 12.9 ± 0.9             | 16.4 ± 1.2                                                           | 36.7 ± 3.5                                | 16.8 ± 2.8             | 2.2 ± 0.4                                                            | 0.17 (0.11)                                                                    |
| I500M/<br>F501W  | 6.3 ± 0.1                                 | 0.7 ± 0.1              | 8.7 ± 0.7                                                            | 37.2 ± 0.6                                | 5.0 ± 0.3              | 7.4 ± 0.4                                                            | 5.90 (3.78)                                                                    |

<sup>a</sup> Reactions in 50 mM sodium phosphate, pH 6.0, at 25°C<sup>b</sup> From Carro *et. al.* [1]**Table S3.** Forward primers used for PCR mutagenesis and corresponding templates<sup>a</sup>

|             | Template   | Primer (5'-3')                                                   |
|-------------|------------|------------------------------------------------------------------|
| H91N        | native AAO | GGG GGG TCT AGC TCT GTT <u>AAC</u> TAC ATG GTC ATG ATG --        |
| H91S        | native AAO | -GG TCT AGC TCT GTT <u>AGC</u> TAC ATG GTC ATG ATG C-- --        |
| Y92F        | native AAO | GGG TCT AGC TCT GTT CAC <u>TTC</u> ATG GTC ATG ATG CG-- --       |
| Y92L        | native AAO | GGG TCT AGC TCT GTT CAC <u>CTC</u> ATG GTC ATG ATG CG-- --       |
| F397Y       | native AAO | --C TTT TCC AAC CAA TGG <u>TAC</u> CAC CCA GCT ATC CCT CG        |
| I500A       | native AAO | GAC AAC GCC AAC ACG <u>GCT</u> TTC CAC CCA GTT GG- --- --        |
| I500M       | native AAO | GAC AAC GCC AAC ACG <u>ATG</u> TTC CAC CCA GTT GG- --- --        |
| F501H       | native AAO | --C AAC GCC AAC ACG ATT <u>CAC</u> CAC CCA GTT GGA ACG --        |
| F501W       | native AAO | GAC AAC GCC AAC ACG ATT <u>TGG</u> CAC CCA GTT GG- --- --        |
| I500M/F501W | F501W      | GAC AAC GCC AAC ACG <u>ATG</u> <u>TGG</u> CAC CCA GTT GG- --- -- |

<sup>a</sup>The substituted nucleotides are in bold and the mutated triplets are underlined

**Table S4.** Spectroscopic properties of AAO variants in the visible region<sup>a</sup>

|             | $\lambda^{\text{band I}}$ (nm) | $\lambda^{\text{band II}}$ (nm) | $\epsilon^{\text{band I}}$ (M <sup>-1</sup> cm <sup>-1</sup> ) | Reference   |
|-------------|--------------------------------|---------------------------------|----------------------------------------------------------------|-------------|
| native AAO  | 386                            | 463                             | 11050                                                          | [2]         |
| H91N        | 384                            | 463                             | 12825                                                          | <i>here</i> |
| H91S        | 379                            | 458                             | 11629                                                          | <i>here</i> |
| Y92F        | 386                            | 463                             | 10044                                                          | [3]         |
| Y92L        | 386                            | 463                             | 11240                                                          | [3]         |
| F397Y       | 382                            | 462                             | 10415                                                          | [4]         |
| I500A       | 386                            | 457                             | 9925                                                           | [5]         |
| I500M       | 384                            | 458                             | 9609                                                           | [5]         |
| F501H       | 385                            | 461                             | 9229                                                           | <i>here</i> |
| F501W       | 387                            | 462                             | 9944                                                           | [6]         |
| I500M/F501W | 386                            | 460                             | 9290                                                           | [5]         |

<sup>a</sup> Spectra recorded in 50 mM sodium phosphate, pH 6.0

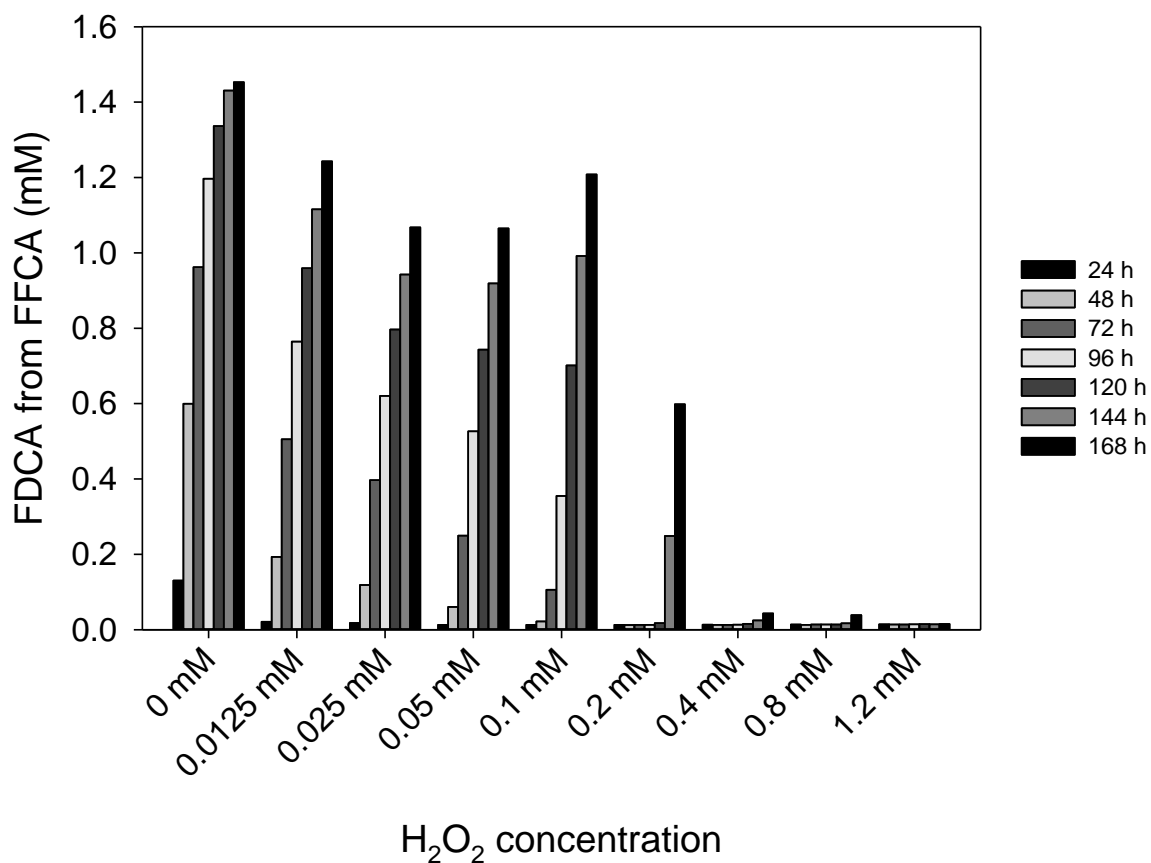

**Figure S1.** Effect of low H<sub>2</sub>O<sub>2</sub> concentrations on the oxidation of FFCA by AAO. Reactions between 1.5 mM FFCA and 2.5 μM AAO were performed in 50 mM sodium phosphate, pH 6.0, at 28°C in presence of different amounts of H<sub>2</sub>O<sub>2</sub> (0.0125 – 1.2 mM).

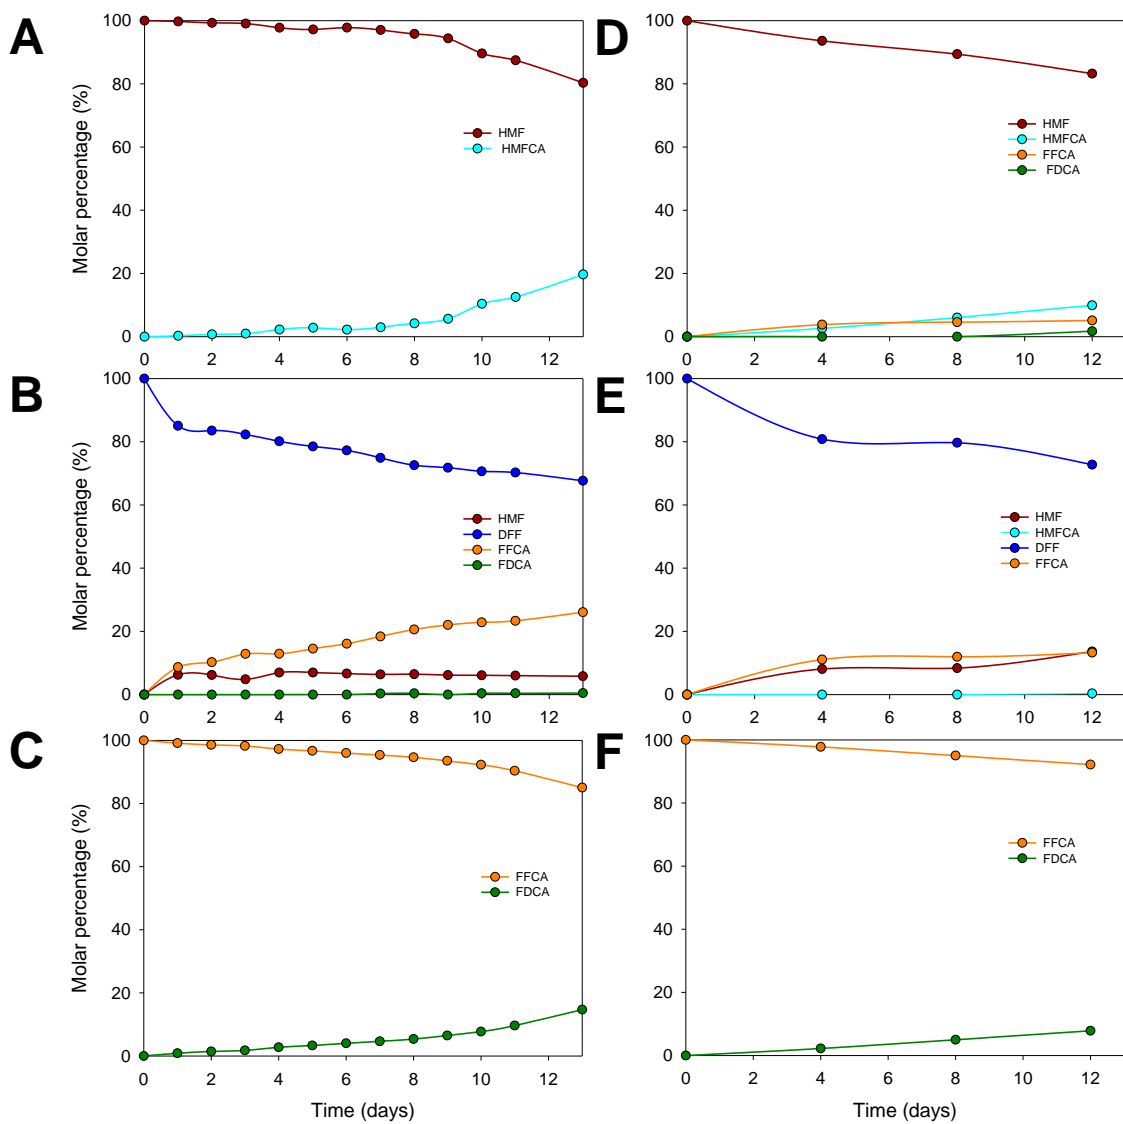

**Figure S2.** Evolution of HMF (A and D), DFF (B and E) and FFCA (C and F) controls along time in absence of AAO (*left*) and in presence of catalase (10-17 U/mL) (*right*). The three compounds (1.5 mM) were incubated in 50 mM sodium phosphate, pH 6.0, at 28°C.

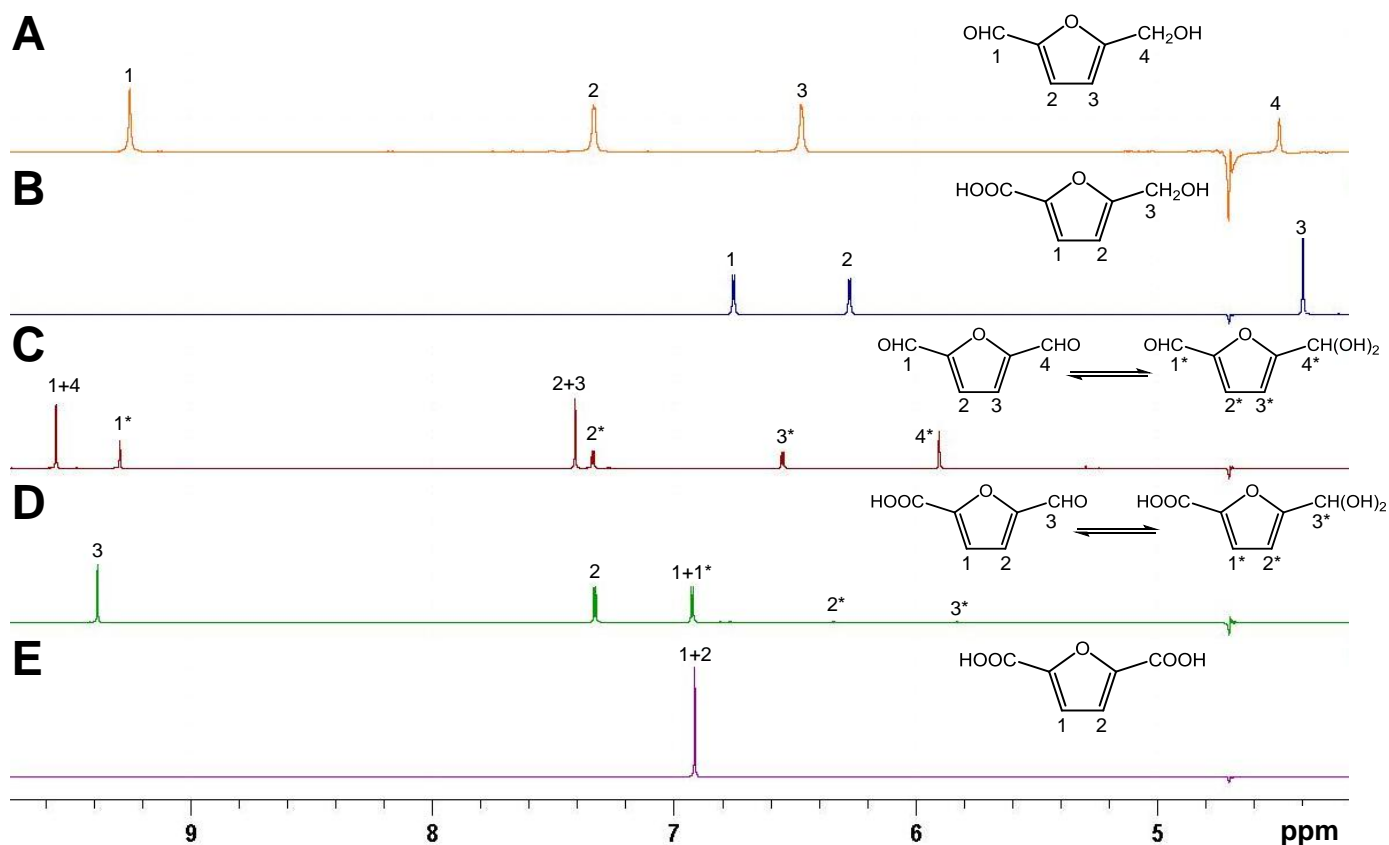

**Figure S3.**  $^1\text{H-NMR}$  (4.2-9.8 ppm) analysis of furfural standards: HMF (A), HMFCFA (B), DFF (C), FFCA (D) and FDCA (E) in 50 mM sodium phosphate, pH 6.0, with 10%  $\text{D}_2\text{O}$ . HMF shows four signal for the protons of the aldehyde group ( $\text{H}_1$ , 9.2 ppm), furanic ring ( $\text{H}_2$  and  $\text{H}_3$ , 7.4 and 6.4 ppm) and hydroxymethyl group ( $\text{H}_4$ , 4.5 ppm) (A). HMFCFA shows three signals of the furanic ring ( $\text{H}_1$  and  $\text{H}_2$ , 6.8 and 6.3 ppm) and hydroxymethyl ( $\text{H}_3$ , 4.4 ppm) protons (B). DFF shows signals of: i) the aldehyde group ( $\text{H}_1$  and  $\text{H}_4$ , 9.5 ppm) and furanic ring ( $\text{H}_2$  and  $\text{H}_3$ , 7.4 ppm) protons of unhydrated DFF; and ii) the unhydrated aldehyde ( $\text{H}_{1^*}$ , 9.3 ppm), furanic ring ( $\text{H}_{2^*}$  and  $\text{H}_{3^*}$ , 7.3 and 6.5 ppm) and hydrated aldehyde ( $\text{H}_{4^*}$ , 5.9 ppm) protons of mono-hydrated DFF. FFCA shows signals of: i) the furanic ring ( $\text{H}_1$  and  $\text{H}_2$ , 6.9 and 7.3 ppm) and aldehyde ( $\text{H}_3$ , 9.4 ppm) protons of unhydrated FFCA; and ii) the furanic ring ( $\text{H}_{2^*}$ , 6.3 ppm, and  $\text{H}_{1^*}$ , 6.9 ppm, overlapping with one signal of unhydrated FFCA) and hydrated aldehyde ( $\text{H}_{3^*}$ , 5.8 ppm) protons of hydrated FFCA (with very low intensities due to its low hydration degree) (D). FDCA only shows the signal of the furanic ring ( $\text{H}_1$  and  $\text{H}_2$ , 6.9 ppm) protons (E).

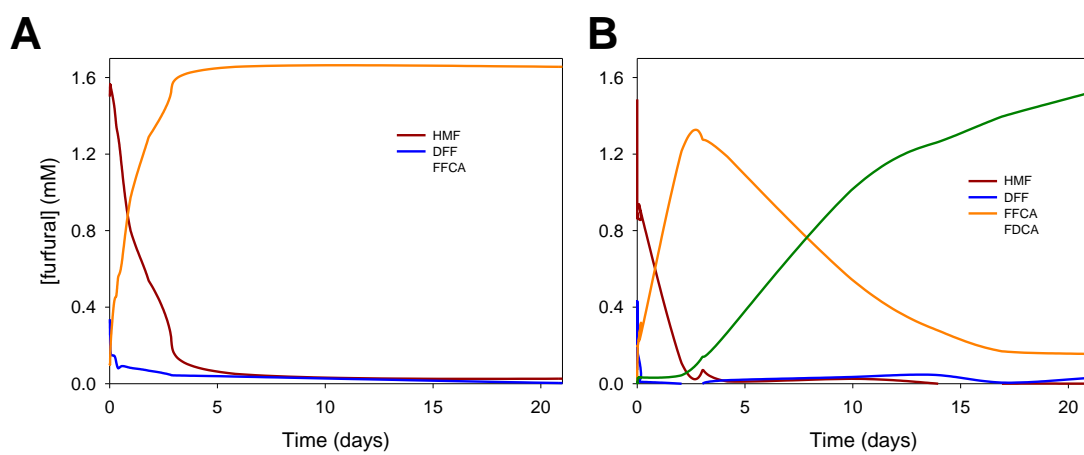

**Figure S4.** Time course of the reaction of HMF with AAO in absence (**A**) and in presence of catalase (**B**) obtained from NMR experiments. Reactions performed in 50 mM sodium phosphate, pH 6.0, 10% D<sub>2</sub>O at room temperature.



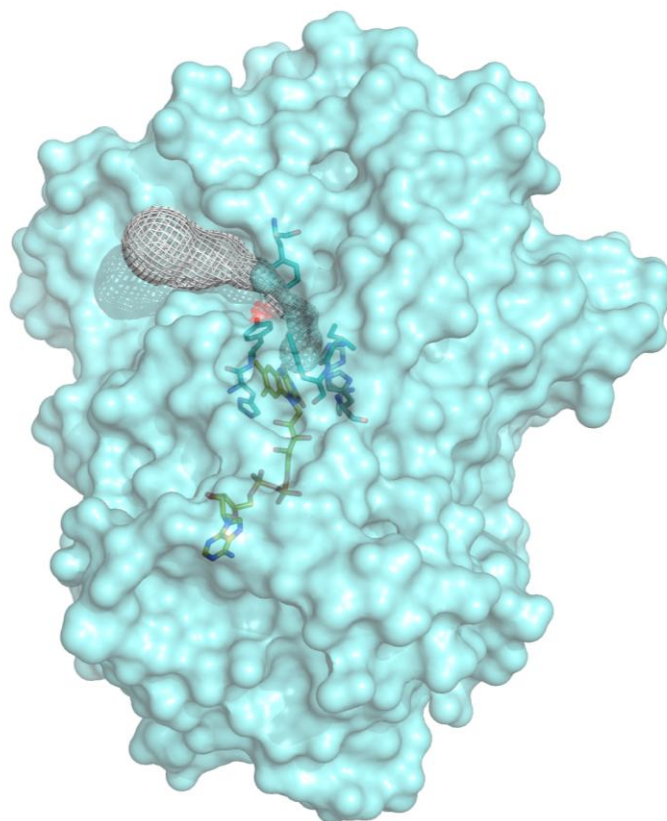

**Figure S5.** Surface (semi-transparent) access to AAO active site showing the FAD cofactor (green-carbon CPK-colored sticks), neighbor residues (cyan-carbon CPK-colored sticks) and channel to the active site (meshes). Based on PDB ID 3FIM.

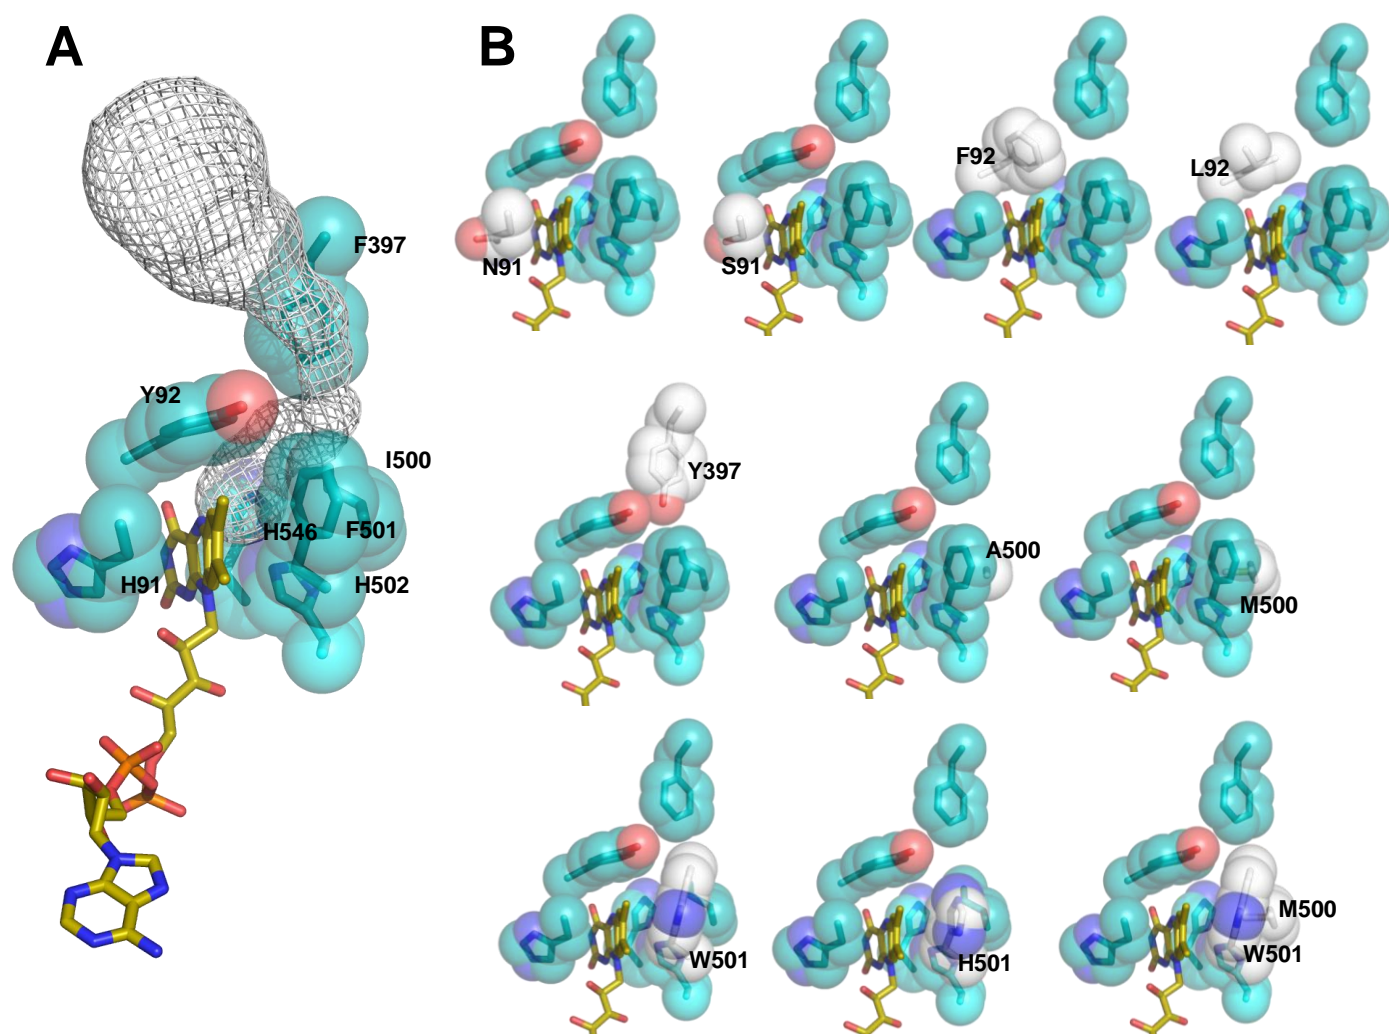

**Figure S6.** Active site of native AAO (Based on PDB ID 3FIM) (**A**) and ten variants (*in silico* introduced on AAO structure (3FIM) using PyMOL software) assayed for HMF conversion into FDCA (**B**). Residues near the isoalloxazine ring of FAD (gold-carbon CPK-colored sticks) are cyan-carbon CPK-colored (sticks inside semi-transparent spheres) with mutated residues showing white-colored carbons. The access channel (meshes) is also shown in **A**.

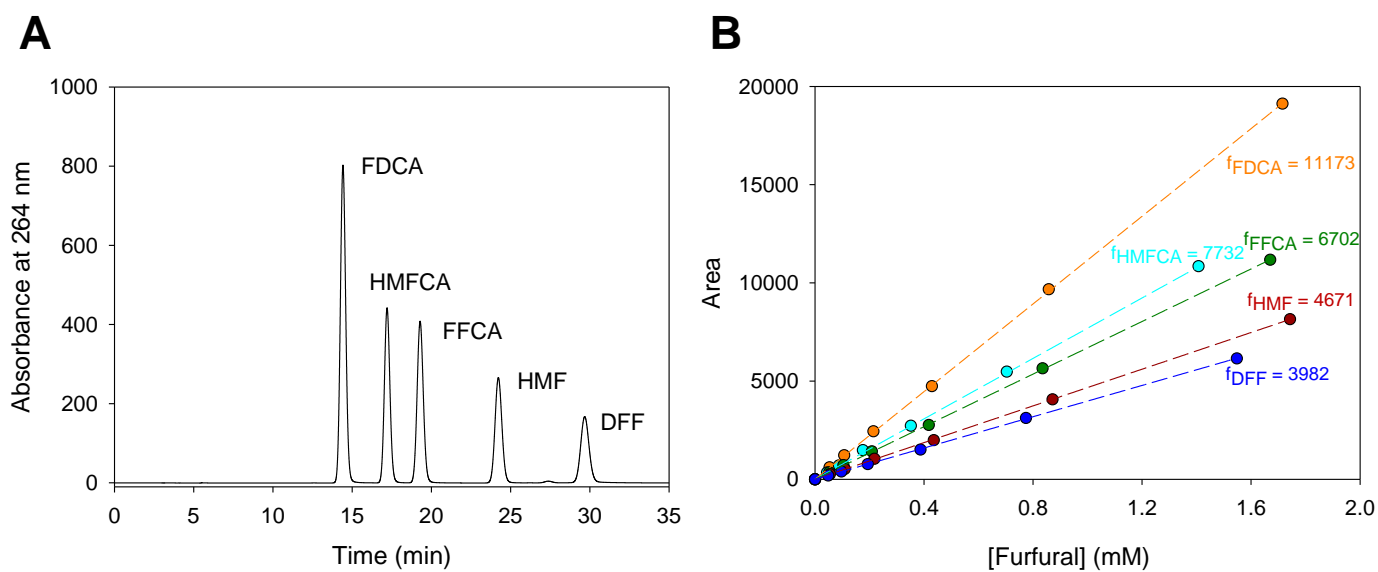

**Figure S7.** HPLC analysis of furfural standards. **(A)** Elution profile of a mixture of FDCA ( $t_R$ , 14 min), HMFCA ( $t_R$ , 17 min), FFCA ( $t_R$ , 19 min), HMF ( $t_R$ , 24 min) and DFF ( $t_R$ , 29 min). **(B)** Calibration curve for the different compounds and response factor for the ratio between the absorbance at 264 nm and the concentration.

## Supporting references

1. Carro J, Ferreira P, Rodríguez L, Prieto A, Serrano A, Balcells B, Ardá A, Jiménez-Barbero J, Gutiérrez A, Ullrich R, Hofrichter M, Martínez AT. 5-Hydroxymethylfurfural conversion by fungal aryl-alcohol oxidase and unspecific peroxygenase. *FEBS J.* 2015, 282:3218-29.
2. Ruiz-Dueñas FJ, Ferreira P, Martínez MJ, Martínez AT. In vitro activation, purification, and characterization of *Escherichia coli* expressed aryl-alcohol oxidase, a unique H<sub>2</sub>O<sub>2</sub>-producing enzyme. *Protein Express Purif.* 2006, 45:191-9.
3. Ferreira P, Hernández-Ortega A, Borrelli K, Lucas F, Herguedas B, Guallar V, Martínez AT, Medina M. Aromatic stacking interactions govern catalysis in aryl-alcohol oxidase. *FEBS J.* 2015, 282:3091-106.
4. Carro J, Amengual-Rigo P, Sancho F, Medina M, Guallar V, Ferreira P, Martínez AT. Multiple implications of an active site phenylalanine in the catalysis of aryl-alcohol oxidase. *Sci Rep.* 2018, 8:8121.
5. Serrano A, Sancho F, Viña-Gonzalez J, Carro J, Alcalde M, Guallar V, Martínez AT. Switching the substrate preference of fungal aryl-alcohol oxidase: towards stereoselective oxidation of secondary benzyl alcohols. *Catal Sci Technol.* 2019, 9:833-41.
6. Hernández-Ortega A, Lucas F, Ferreira P, Medina M, Guallar V, Martínez AT. Modulating O<sub>2</sub> reactivity in a fungal flavoenzyme: Involvement of aryl-alcohol oxidase Phe-501 contiguous to catalytic histidine. *J Biol Chem.* 2011, 286:41105-14.
